# Supplementary material for: Comparing Cerebellar tDCS and Cerebellar tACS in Neurodegenerative Ataxias Using Wearable Sensors: A Randomized, Double-Blind, Sham-Controlled, Triple-Crossover Trial
Source: Springer Nature journal article supplement (doi:10.1007/s12311-023-01578-6), 2023-06-22
Supplement: MOESM1 [file 12311_2023_1578_MOESM1_ESM.pdf]

**Supplementary Figure 1.** Flow chart of the study.

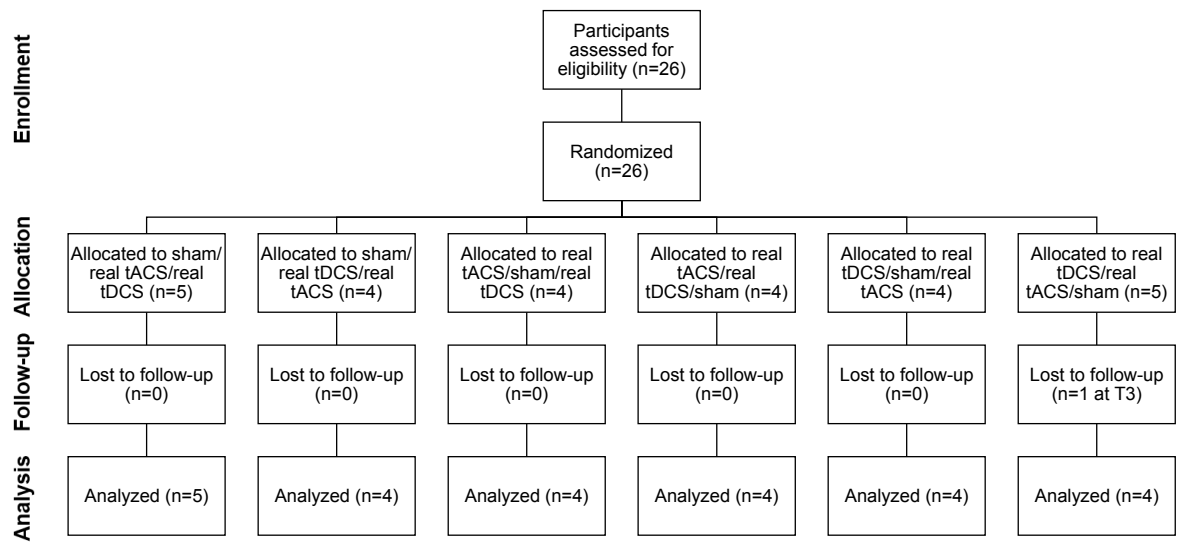

Legend: tACS = transcranial alternating current stimulation; tDCS = transcranial direct current stimulation.

**Supplementary Figure 2.** Changes in wearable sensors parameters, SARA and ICARS scores compared to baseline after tACS, tDCS or sham stimulation. Individual values are represented.

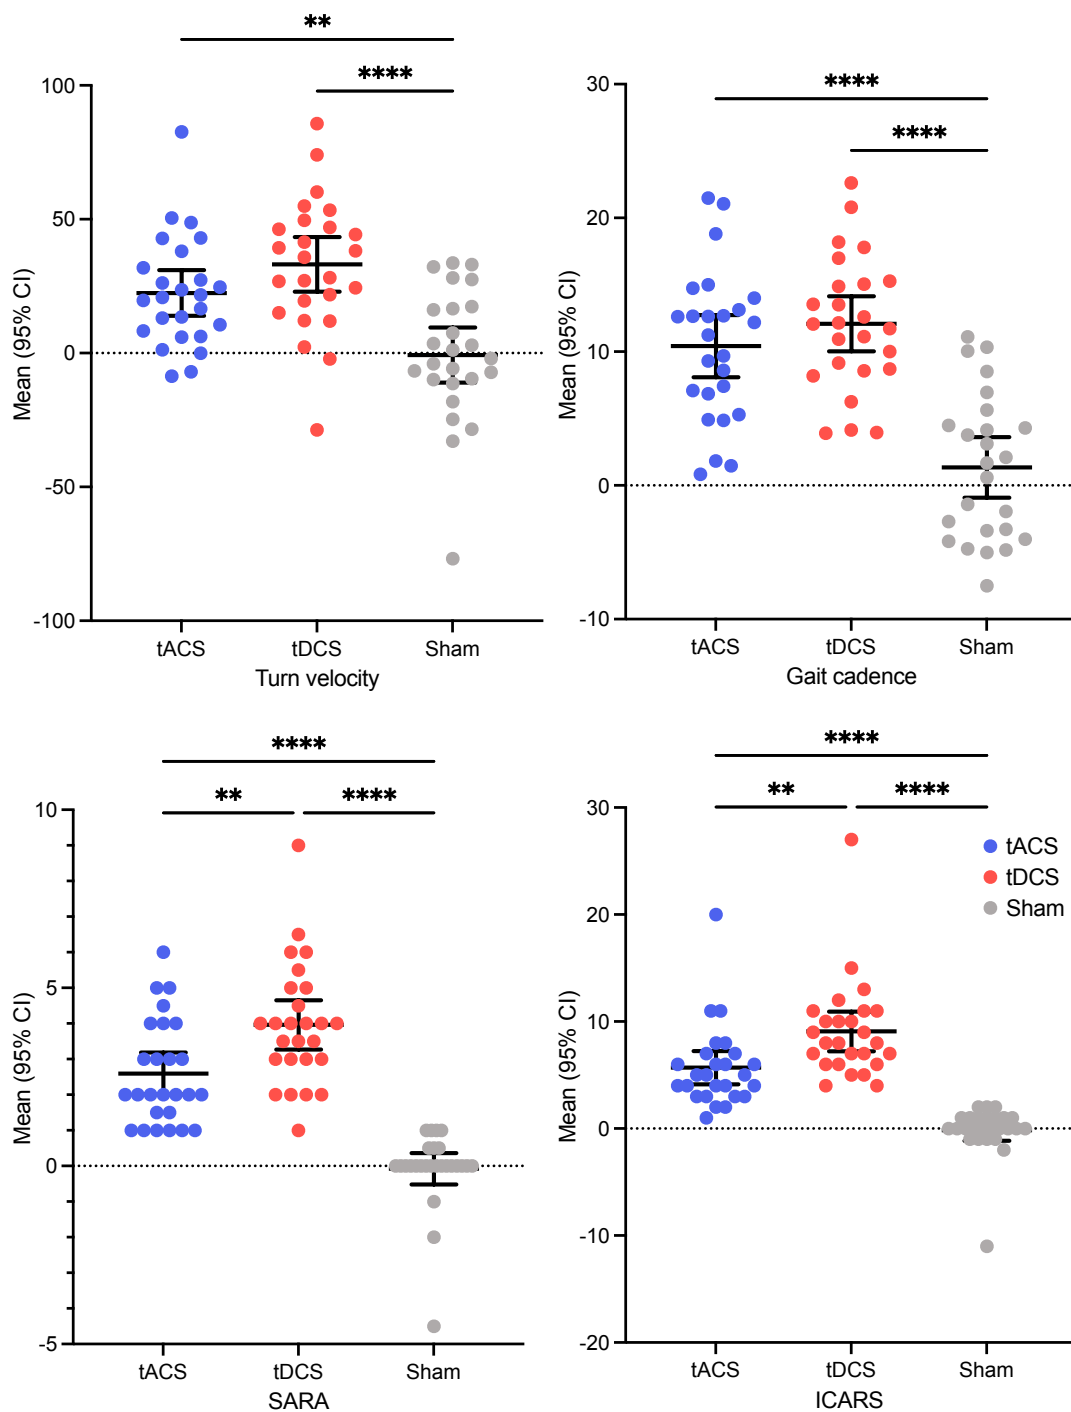

Legend: tACS = transcranial alternating current stimulation; tDCS = transcranial direct current stimulation; SARA = scale for the rating of ataxia; ICARS = international cooperative ataxia rating scale.

\*\* $p < 0.01$ ; \*\*\* $p < 0.001$ ; \*\*\*\* $p < 0.0001$ ; Long bars represent mean values while error bars represent 95% confidence intervals.
